# Supplementary material for: Analysis of the Complete Genome Sequence of a Novel, Pseudorabies Virus Strain Isolated in Southeast Europe
Source: Hindawi journal article supplement (doi:10.1155/2019/1806842), 2019-04-04

| Gene   | MdBio-Kaplan         |                        | MdBio-Ea             |                        |
|--------|----------------------|------------------------|----------------------|------------------------|
|        | Total number of SNVs | Total number of INDELS | Total number of SNVs | Total number of INDELS |
| orf-1  | 9                    | 1                      | 30                   | 1                      |
| ul54   | 6                    | 0                      | 29                   | 0                      |
| ul53   | 4                    | 0                      | 23                   | 0                      |
| ul52   | 16                   | 0                      | 53                   | 6                      |
| ul51   | 2                    | 0                      | 18                   | 4                      |
| ul50   | 4                    | 0                      | 16                   | 0                      |
| ul49.5 | 4                    | 0                      | 13                   | 0                      |
| ul49   | 11                   | 1                      | 15                   | 4                      |
| ul48   | 6                    | 0                      | 19                   | 0                      |
| ul47   | 25                   | 3                      | 66                   | 4                      |
| ul46   | 7                    | 1                      | 73                   | 4                      |
| ul27   | 19                   | 1                      | 41                   | 2                      |
| ul28   | 6                    | 0                      | 22                   | 2                      |
| ul29   | 8                    | 0                      | 33                   | 3                      |
| ul30   | 10                   | 0                      | 27                   | 0                      |
| ul31   | 0                    | 0                      | 12                   | 0                      |
| ul32   | 6                    | 0                      | 14                   | 1                      |
| ul33   | 1                    | 1                      | 7                    | 1                      |
| ul34   | 11                   | 1                      | 25                   | 0                      |
| ul35   | 0                    | 0                      | 2                    | 0                      |
| ul36.5 | 6                    | 5                      | 92                   | 11                     |
| ul36   | 62                   | 8                      | 370                  | 30                     |
| ul37   | 4                    | 0                      | 48                   | 0                      |
| ul38   | 0                    | 0                      | 15                   | 0                      |
| ul39   | 4                    | 0                      | 28                   | 1                      |
| ul40   | 0                    | 0                      | 4                    | 0                      |
| ul41   | 2                    | 0                      | 19                   | 0                      |
| ul42   | 26                   | 2                      | 15                   | 2                      |
| ul43   | 2                    | 0                      | 8                    | 0                      |
| ul44   | 22                   | 0                      | 53                   | 1                      |
| ul26.5 | 8                    | 0                      | 13                   | 3                      |
| ul26   | 10                   | 0                      | 16                   | 3                      |
| ul25   | 10                   | 0                      | 14                   | 2                      |
| ul24   | 4                    | 0                      | 5                    | 0                      |
| ul23   | 6                    | 0                      | 5                    | 0                      |
| ul22   | 12                   | 0                      | 4                    | 1                      |
| ul21   | 6                    | 0                      | 31                   | 2                      |
| ul20   | 0                    | 0                      | 13                   | 2                      |
| ul19   | 8                    | 0                      | 27                   | 0                      |
| ul18   | 0                    | 0                      | 8                    | 0                      |
| ul17   | 10                   | 0                      | 35                   | 2                      |
| ul16   | 2                    | 0                      | 36                   | 0                      |
| ul15   | 4                    | 2                      | 45                   | 5                      |
| ul14   | 2                    | 0                      | 8                    | 0                      |
| ul13   | 4                    | 0                      | 29                   | 1                      |
| ul12   | 17                   | 1                      | 31                   | 2                      |
| ul11   | 10                   | 0                      | 4                    | 0                      |
| ul10   | 2                    | 0                      | 19                   | 0                      |
| ul9    | 11                   | 1                      | 26                   | 1                      |
| ul8    | 18                   | 0                      | 45                   | 1                      |
| ul7    | 2                    | 0                      | 11                   | 0                      |
| ul6    | 6                    | 0                      | 6                    | 4                      |
| ul5    | 14                   | 0                      | 3                    | 2                      |
| ul4    | 0                    | 0                      | 4                    | 0                      |
| ul3.5  | 22                   | 2                      | 15                   | 2                      |
| ul3    | 5                    | 1                      | 10                   | 1                      |
| ul2    | 5                    | 1                      | 6                    | 2                      |
| ul1    | 8                    | 0                      | 17                   | 0                      |
| ep0    | 4                    | 0                      | 15                   | 2                      |
| ie180  | 37                   | 7                      | 54                   | 12                     |
| us1    | 28                   | 4                      | 24                   | 3                      |
| us3    | 10                   | 0                      | 22                   | 0                      |
| us4    | 14                   | 0                      | 13                   | 0                      |
| us6    | 0                    | 0                      | 15                   | 1                      |
| us7    | 6                    | 0                      | 35                   | 3                      |
| us8    | 21                   | 1                      | 29                   | 2                      |
| us9    | 2                    | 0                      | 9                    | 0                      |
| us2    | 2                    | 0                      | 18                   | 0                      |

| Gene   | MdBio-Kaplan                           |                                          | MdBio-Ea                               |                                          |
|--------|----------------------------------------|------------------------------------------|----------------------------------------|------------------------------------------|
|        | Total number of SNVs/<br>Length of ORF | Total number of INDELS/<br>Length of ORF | Total number of SNVs/<br>Length of ORF | Total number of INDELS/<br>Length of ORF |
| orf-1  | 0,0144                                 | 0,0016                                   | 0,0481                                 | 0,0016                                   |
| ul54   | 0,0055                                 | 0,0000                                   | 0,0267                                 | 0,0000                                   |
| ul53   | 0,0043                                 | 0,0000                                   | 0,0245                                 | 0,0000                                   |
| ul52   | 0,0055                                 | 0,0000                                   | 0,0183                                 | 0,0021                                   |
| ul51   | 0,0028                                 | 0,0000                                   | 0,0253                                 | 0,0056                                   |
| ul50   | 0,0050                                 | 0,0000                                   | 0,0198                                 | 0,0000                                   |
| ul49.5 | 0,0135                                 | 0,0000                                   | 0,0438                                 | 0,0000                                   |
| ul49   | 0,0147                                 | 0,0013                                   | 0,0200                                 | 0,0053                                   |
| ul48   | 0,0048                                 | 0,0000                                   | 0,0153                                 | 0,0000                                   |
| ul47   | 0,0111                                 | 0,0013                                   | 0,0292                                 | 0,0018                                   |
| ul46   | 0,0034                                 | 0,0005                                   | 0,0351                                 | 0,0019                                   |
| ul27   | 0,0069                                 | 0,0004                                   | 0,0148                                 | 0,0007                                   |
| ul28   | 0,0028                                 | 0,0000                                   | 0,0102                                 | 0,0009                                   |
| ul29   | 0,0023                                 | 0,0000                                   | 0,0093                                 | 0,0008                                   |
| ul30   | 0,0032                                 | 0,0000                                   | 0,0086                                 | 0,0000                                   |
| ul31   | 0,0000                                 | 0,0000                                   | 0,0147                                 | 0,0000                                   |
| ul32   | 0,0042                                 | 0,0000                                   | 0,0099                                 | 0,0007                                   |
| ul33   | 0,0029                                 | 0,0029                                   | 0,0201                                 | 0,0029                                   |
| ul34   | 0,0139                                 | 0,0013                                   | 0,0317                                 | 0,0000                                   |
| ul35   | 0,0000                                 | 0,0000                                   | 0,0064                                 | 0,0000                                   |
| ul36.5 | 0,0037                                 | 0,0030                                   | 0,0560                                 | 0,0067                                   |
| ul36   | 0,0066                                 | 0,0009                                   | 0,0397                                 | 0,0032                                   |
| ul37   | 0,0014                                 | 0,0000                                   | 0,0174                                 | 0,0000                                   |
| ul38   | 0,0000                                 | 0,0000                                   | 0,0136                                 | 0,0000                                   |
| ul39   | 0,0017                                 | 0,0000                                   | 0,0118                                 | 0,0004                                   |
| ul40   | 0,0000                                 | 0,0000                                   | 0,0044                                 | 0,0000                                   |
| ul41   | 0,0018                                 | 0,0000                                   | 0,0173                                 | 0,0000                                   |
| ul42   | 0,0225                                 | 0,0017                                   | 0,0130                                 | 0,0017                                   |
| ul43   | 0,0018                                 | 0,0000                                   | 0,0071                                 | 0,0000                                   |
| ul44   | 0,0152                                 | 0,0000                                   | 0,0367                                 | 0,0007                                   |
| ul26.5 | 0,0096                                 | 0,0000                                   | 0,0155                                 | 0,0036                                   |
| ul26   | 0,0063                                 | 0,0000                                   | 0,0102                                 | 0,0019                                   |
| ul25   | 0,0062                                 | 0,0000                                   | 0,0087                                 | 0,0012                                   |
| ul24   | 0,0078                                 | 0,0000                                   | 0,0097                                 | 0,0000                                   |
| ul23   | 0,0062                                 | 0,0000                                   | 0,0052                                 | 0,0000                                   |
| ul22   | 0,0058                                 | 0,0000                                   | 0,0019                                 | 0,0005                                   |
| ul21   | 0,0038                                 | 0,0000                                   | 0,0196                                 | 0,0013                                   |
| ul20   | 0,0000                                 | 0,0000                                   | 0,0267                                 | 0,0041                                   |
| ul19   | 0,0020                                 | 0,0000                                   | 0,0068                                 | 0,0000                                   |
| ul18   | 0,0000                                 | 0,0000                                   | 0,0090                                 | 0,0000                                   |
| ul17   | 0,0045                                 | 0,0000                                   | 0,0159                                 | 0,0009                                   |
| ul16   | 0,0011                                 | 0,0000                                   | 0,0201                                 | 0,0000                                   |
| ul15   | 0,0041                                 | 0,0020                                   | 0,0456                                 | 0,0051                                   |
| ul14   | 0,0042                                 | 0,0000                                   | 0,0167                                 | 0,0000                                   |
| ul13   | 0,0033                                 | 0,0000                                   | 0,0242                                 | 0,0008                                   |
| ul12   | 0,0117                                 | 0,0007                                   | 0,0213                                 | 0,0014                                   |
| ul11   | 0,0521                                 | 0,0000                                   | 0,0208                                 | 0,0000                                   |
| ul10   | 0,0017                                 | 0,0000                                   | 0,0161                                 | 0,0000                                   |
| ul9    | 0,0043                                 | 0,0004                                   | 0,0103                                 | 0,0004                                   |
| ul8    | 0,0088                                 | 0,0000                                   | 0,0219                                 | 0,0005                                   |
| ul7    | 0,0025                                 | 0,0000                                   | 0,0137                                 | 0,0000                                   |
| ul6    | 0,0031                                 | 0,0000                                   | 0,0031                                 | 0,0021                                   |
| ul5    | 0,0056                                 | 0,0000                                   | 0,0012                                 | 0,0008                                   |
| ul4    | 0,0000                                 | 0,0000                                   | 0,0091                                 | 0,0000                                   |
| ul3.5  | 0,0326                                 | 0,0030                                   | 0,0222                                 | 0,0030                                   |
| ul3    | 0,0070                                 | 0,0014                                   | 0,0140                                 | 0,0014                                   |
| ul2    | 0,0053                                 | 0,0011                                   | 0,0063                                 | 0,0021                                   |
| ul1    | 0,0170                                 | 0,0000                                   | 0,0361                                 | 0,0000                                   |
| ep0    | 0,0037                                 | 0,0000                                   | 0,0137                                 | 0,0018                                   |
| ie180  | 0,0085                                 | 0,0016                                   | 0,0124                                 | 0,0028                                   |
| us1    | 0,0256                                 | 0,0037                                   | 0,0219                                 | 0,0027                                   |
| us3    | 0,0100                                 | 0,0000                                   | 0,0219                                 | 0,0000                                   |
| us4    | 0,0093                                 | 0,0000                                   | 0,0087                                 | 0,0000                                   |
| us6    | 0,0000                                 | 0,0000                                   | 0,0125                                 | 0,0008                                   |
| us7    | 0,0055                                 | 0,0000                                   | 0,0319                                 | 0,0027                                   |
| us8    | 0,0121                                 | 0,0006                                   | 0,0167                                 | 0,0012                                   |
| us9    | 0,0067                                 | 0,0000                                   | 0,0303                                 | 0,0000                                   |
| us2    | 0,0026                                 | 0,0000                                   | 0,0233                                 | 0,0000                                   |

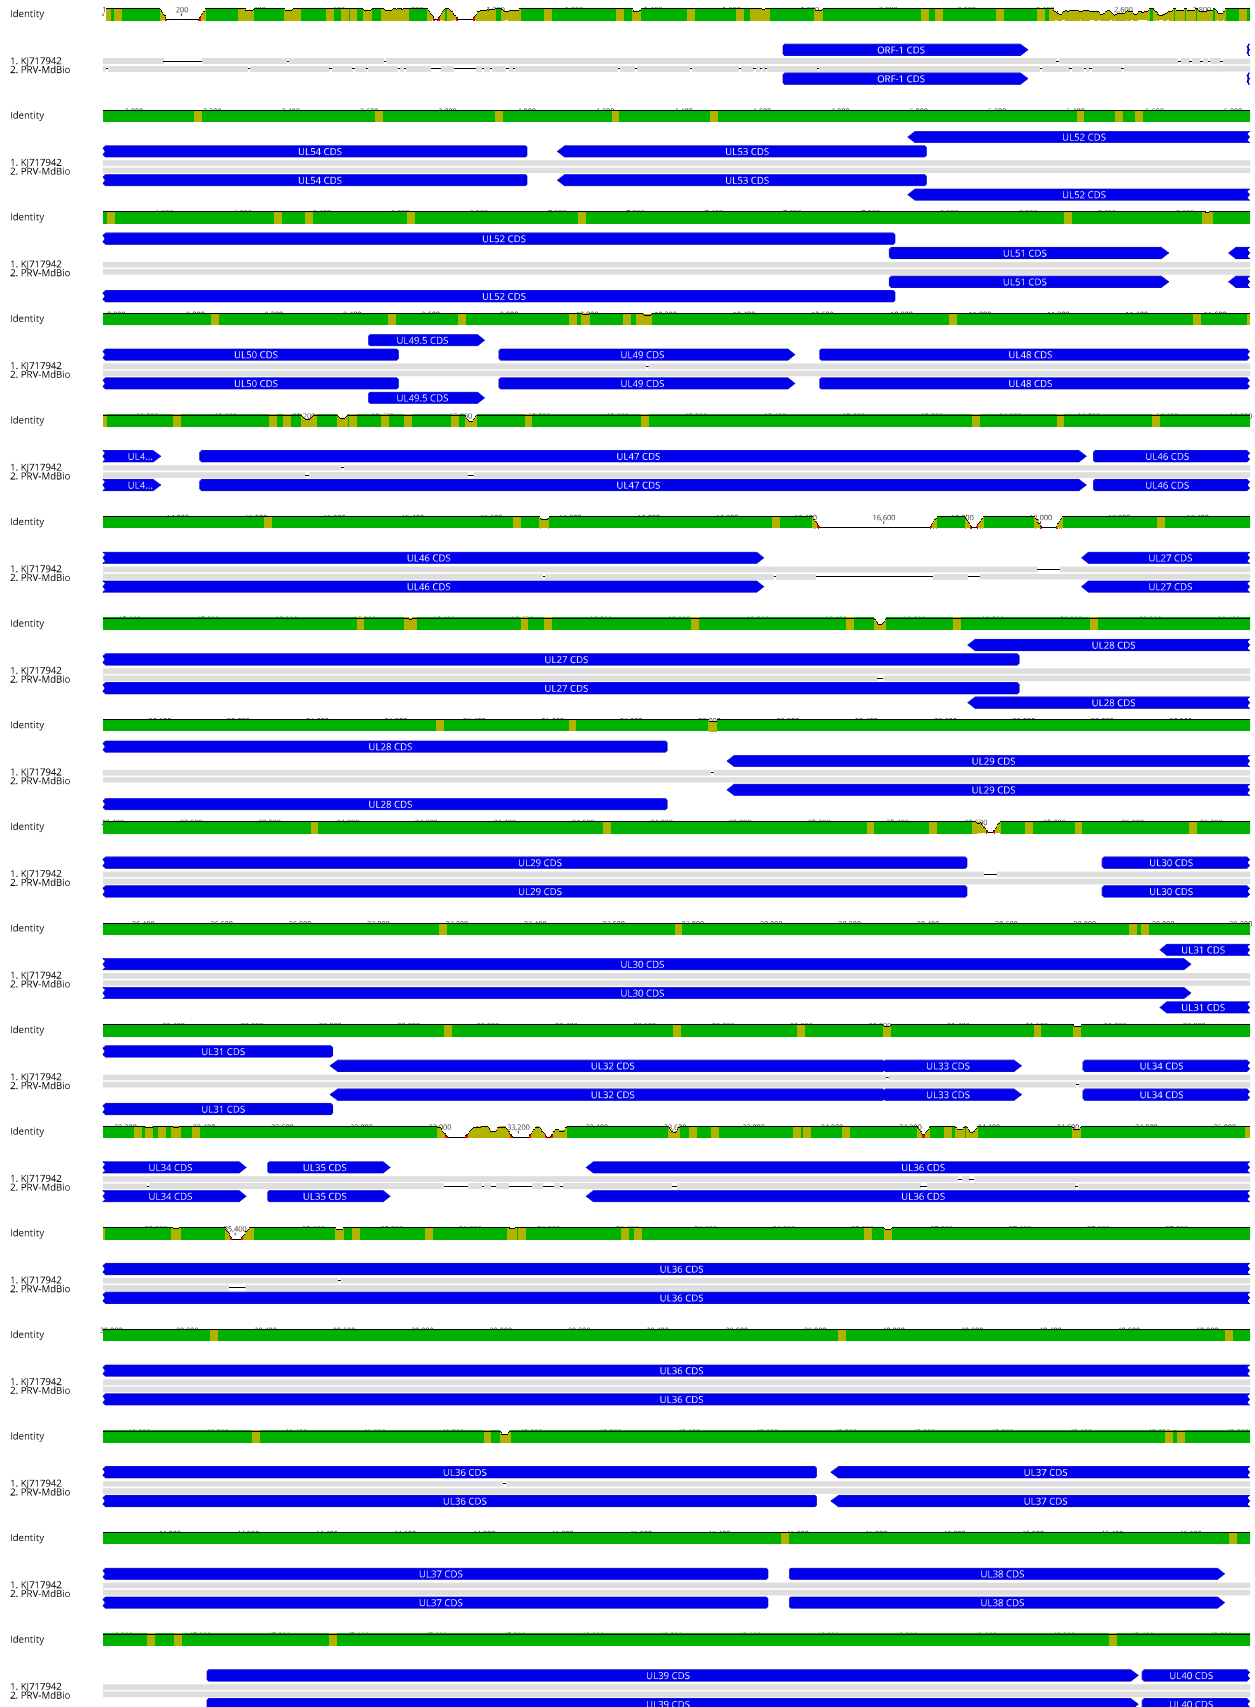

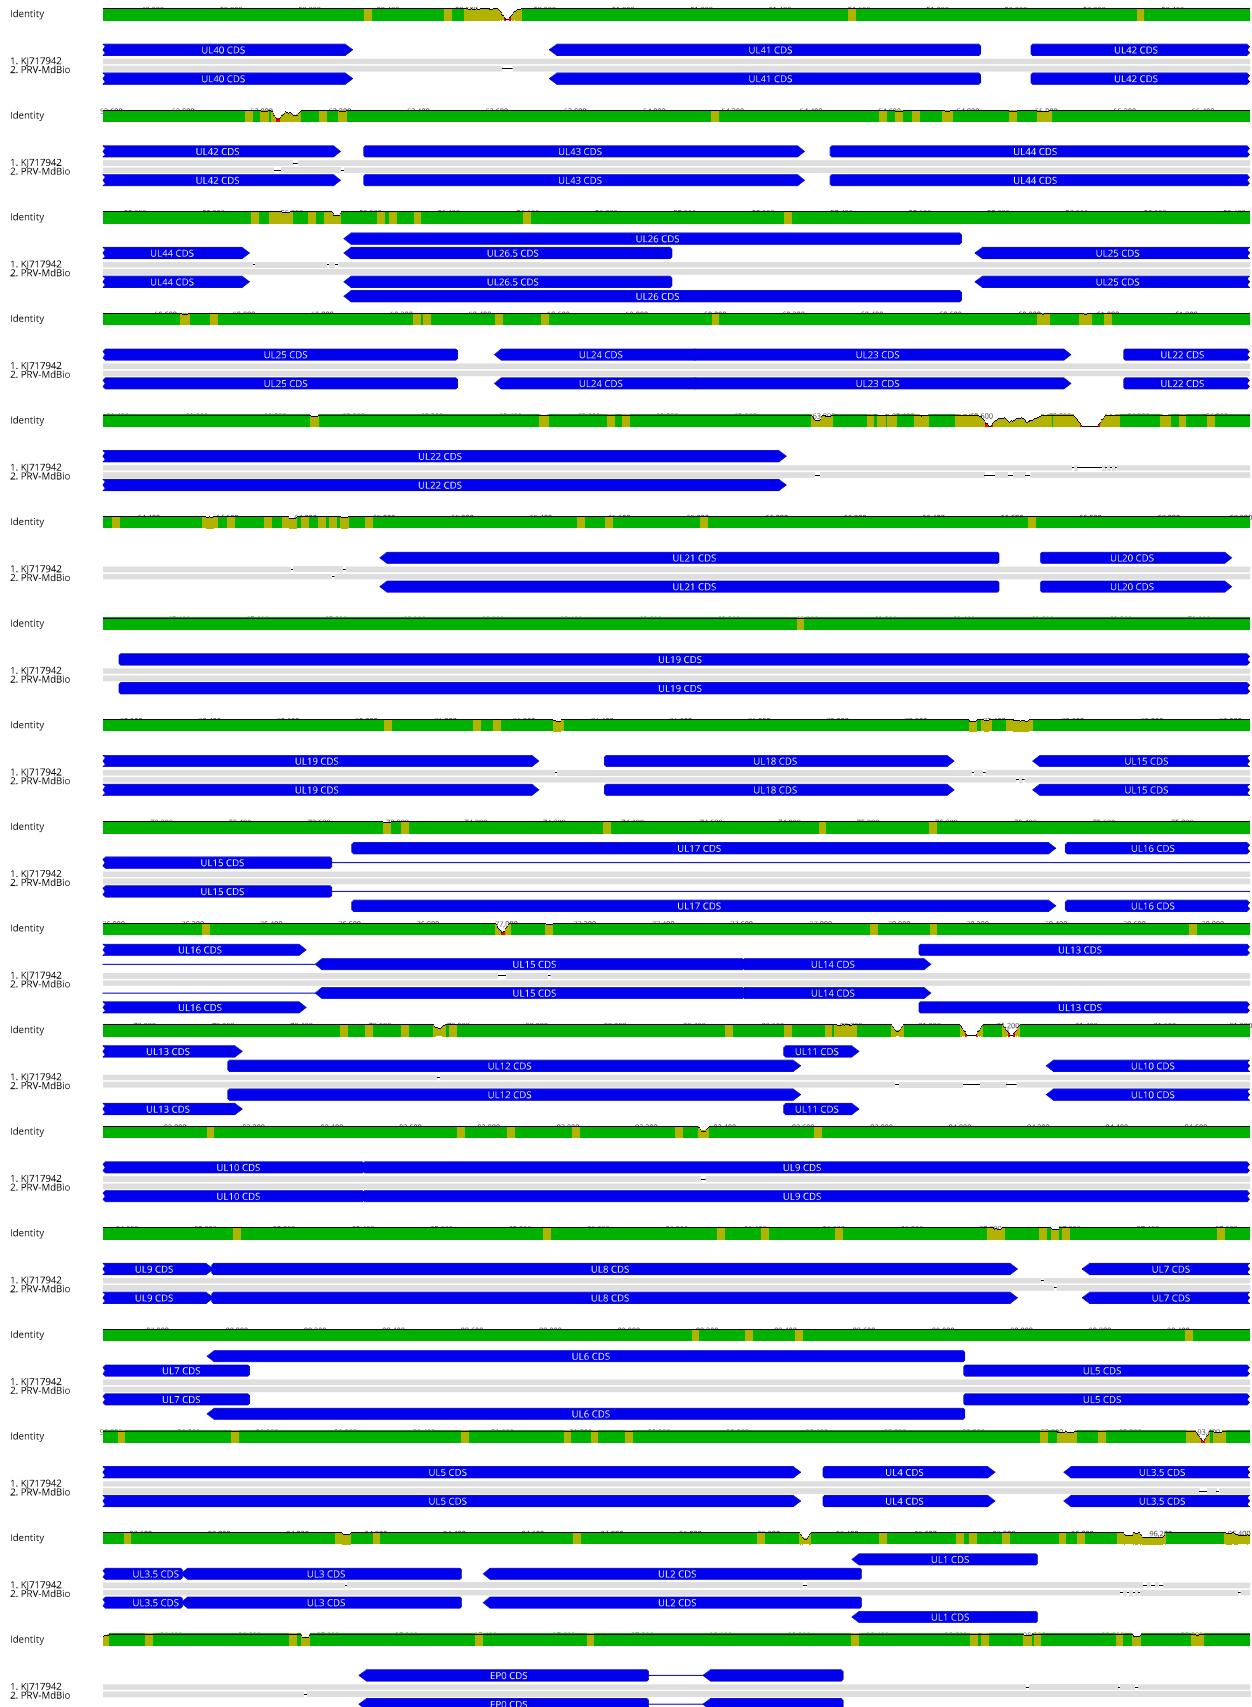



| Time       | Ka 0.1 pfu/cell |          | MdBio 0.1 pfu/cell |          | Ka 10 pfu/cell |          | MdBio 10 pfu/cell |          |
|------------|-----------------|----------|--------------------|----------|----------------|----------|-------------------|----------|
|            | Mean            | SE       | Mean               | SE       | Mean           | SE       | Mean              | SE       |
| <b>4h</b>  | 1.03E+01        | 8.39E-01 | 6.67E+00           | 1.64E+00 | 6.07E+02       | 3.89E+01 | 5.73E+02          | 4.86E+01 |
| <b>8h</b>  | 1.70E+03        | 3.48E+02 | 1.35E+03           | 1.96E+02 | 6.50E+05       | 1.30E+05 | 1.41E+06          | 5.20E+05 |
| <b>12h</b> | 6.07E+03        | 5.40E+02 | 5.97E+03           | 7.46E+02 | 3.07E+07       | 4.76E+06 | 2.93E+07          | 3.02E+06 |
| <b>18h</b> | 3.73E+05        | 1.19E+05 | 8.60E+04           | 4.84E+03 | 4.90E+08       | 5.78E+07 | 4.50E+08          | 7.37E+07 |
| <b>24h</b> | 7.77E+05        | 1.04E+05 | 7.67E+05           | 7.13E+04 | 1.26E+08       | 2.13E+07 | 8.93E+07          | 3.02E+06 |

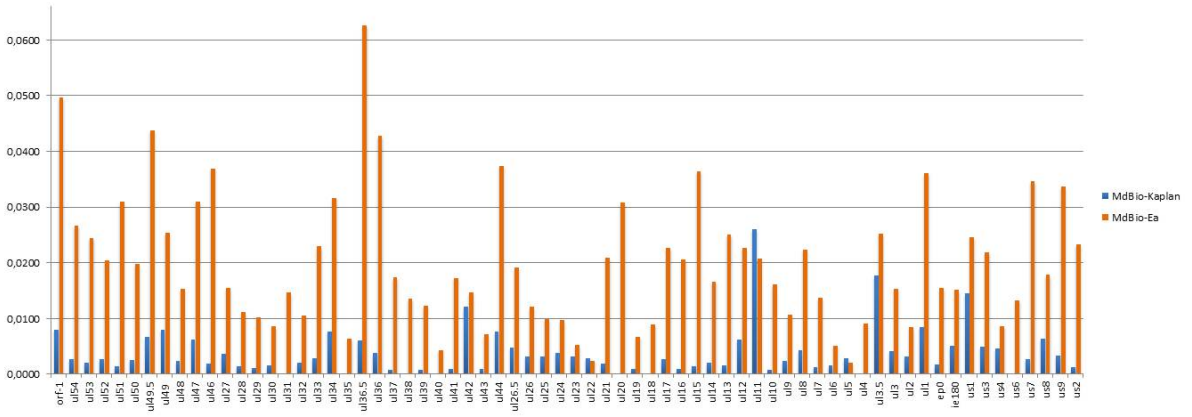

| <b>Name</b>      | <b>Sequence (5'-3')</b>  |
|------------------|--------------------------|
|                  |                          |
| <b>ul23 fw</b>   | ATGACGGTCGTCTTTGACCGCCAC |
| <b>ul23 rev</b>  | CGCTGATGTCCCCGACGATGAA   |
| <b>ul29 fw</b>   | CTGATCCTGCGCTACTGCG      |
| <b>ul29 rev</b>  | ACTGCATCGTGATCCCCG       |
| <b>ul44 fw</b>   | TCGTGAGCAGCATGATCGT      |
| <b>ul44 rev</b>  | GTCGCCATGATGACCAGC       |
| <b>ie180 fw</b>  | CATCGTGCTGGACACCATCGAG   |
| <b>ie180 rev</b> | ACGTAGACGTGGTAGTCCCCCA   |

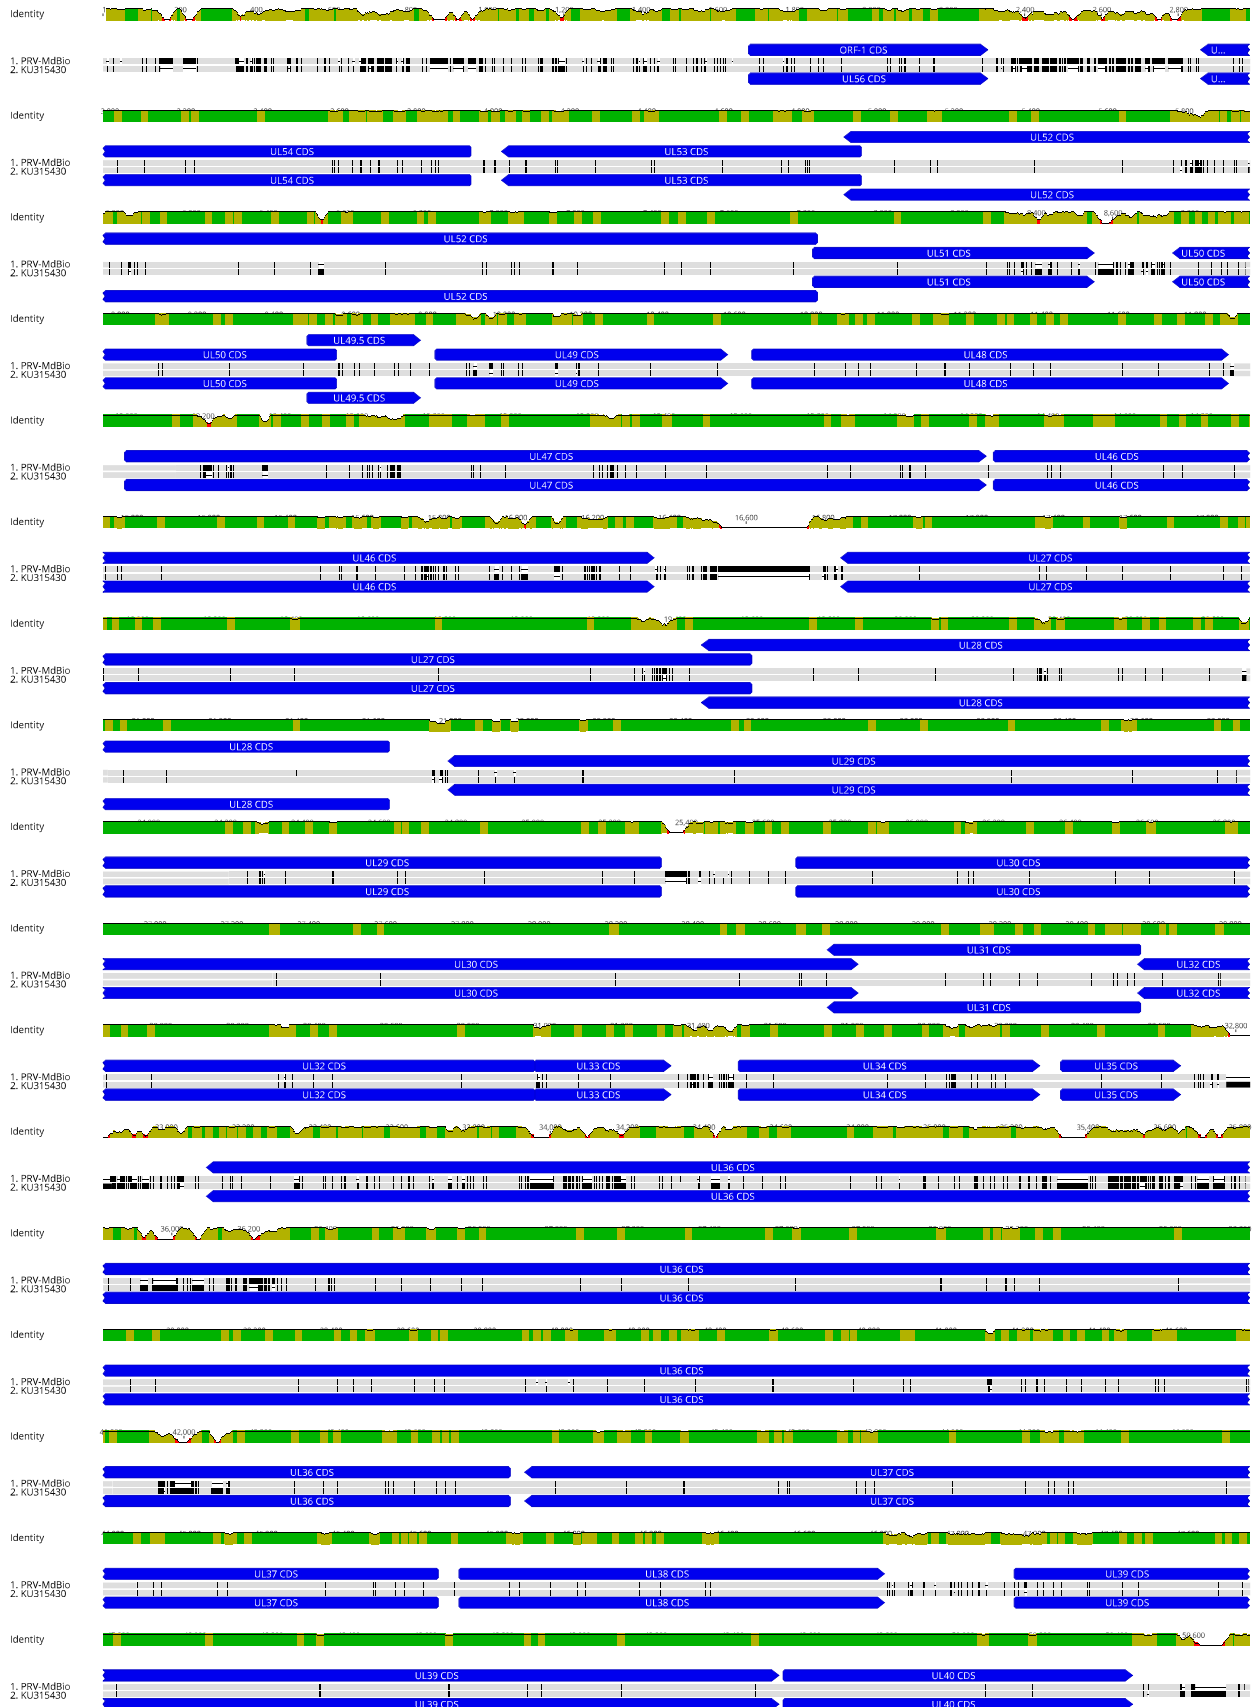



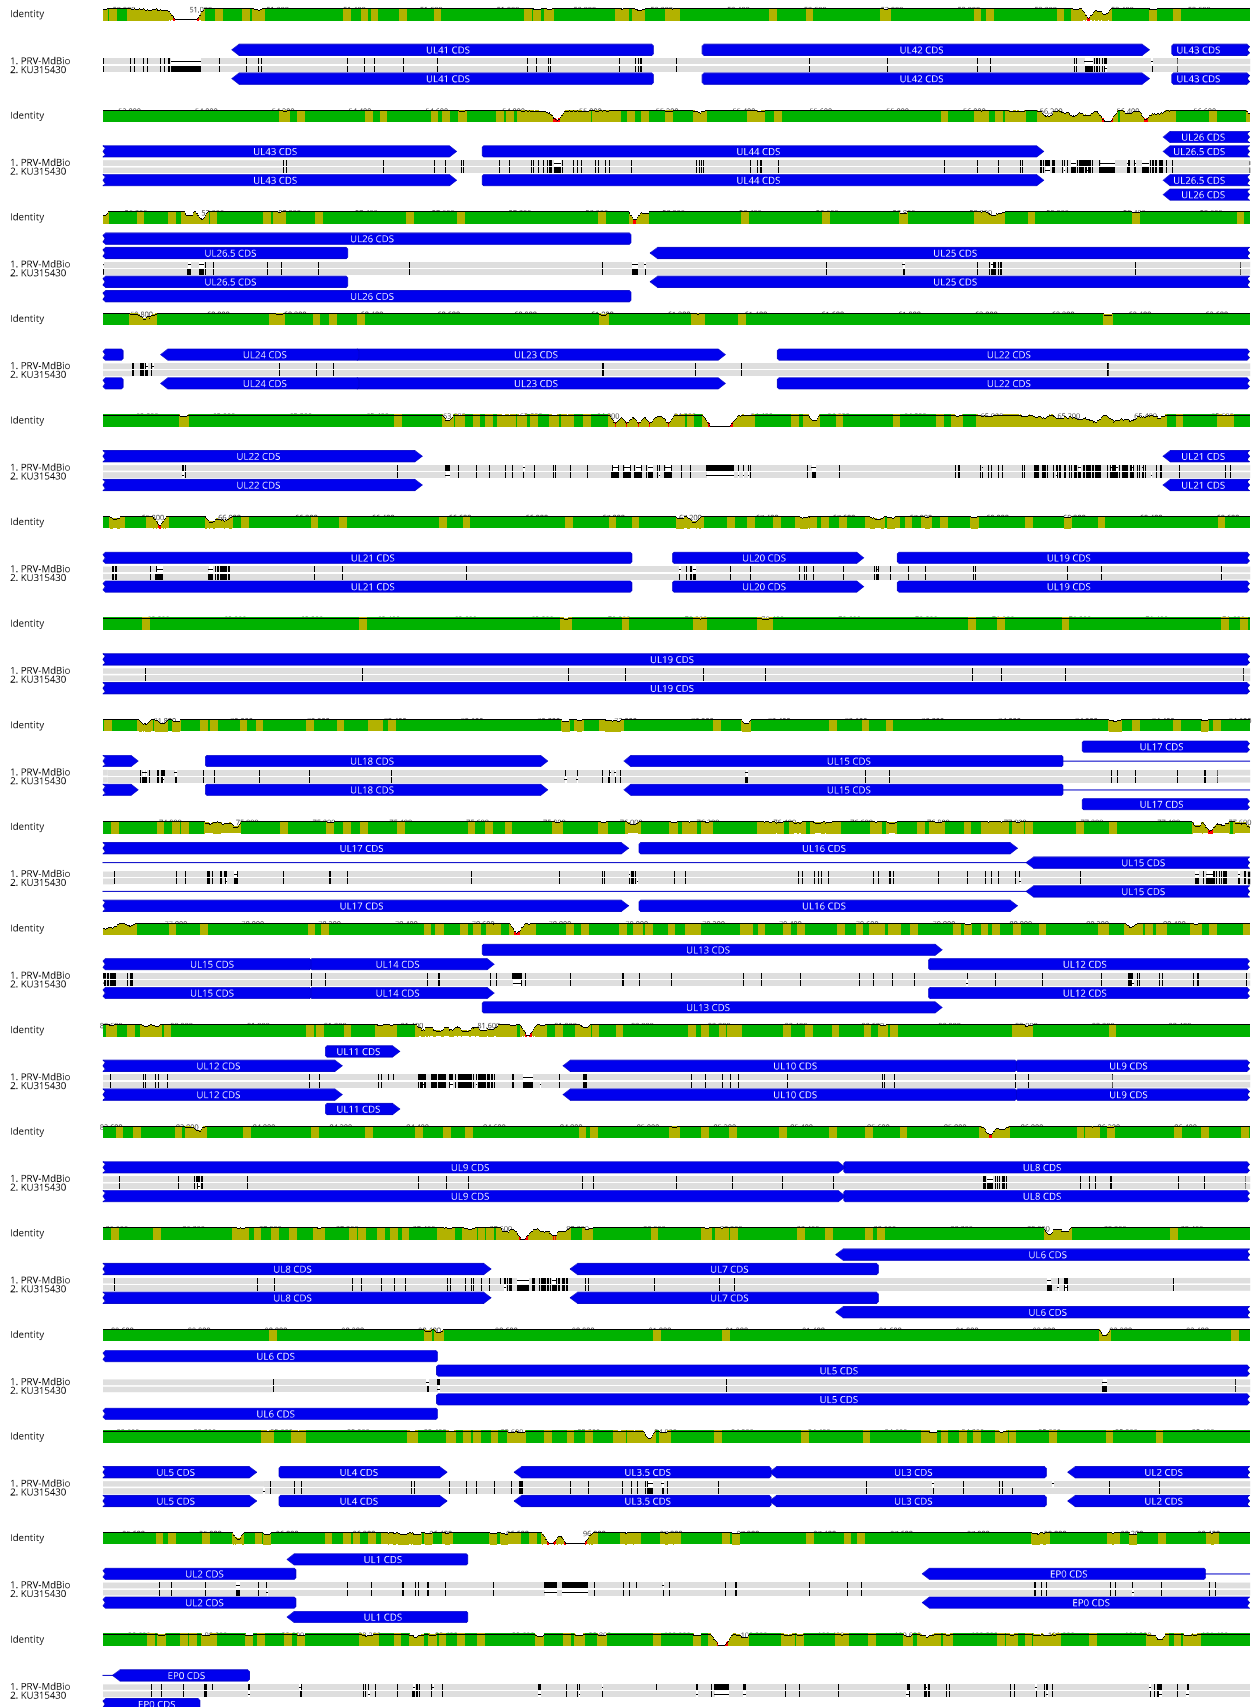

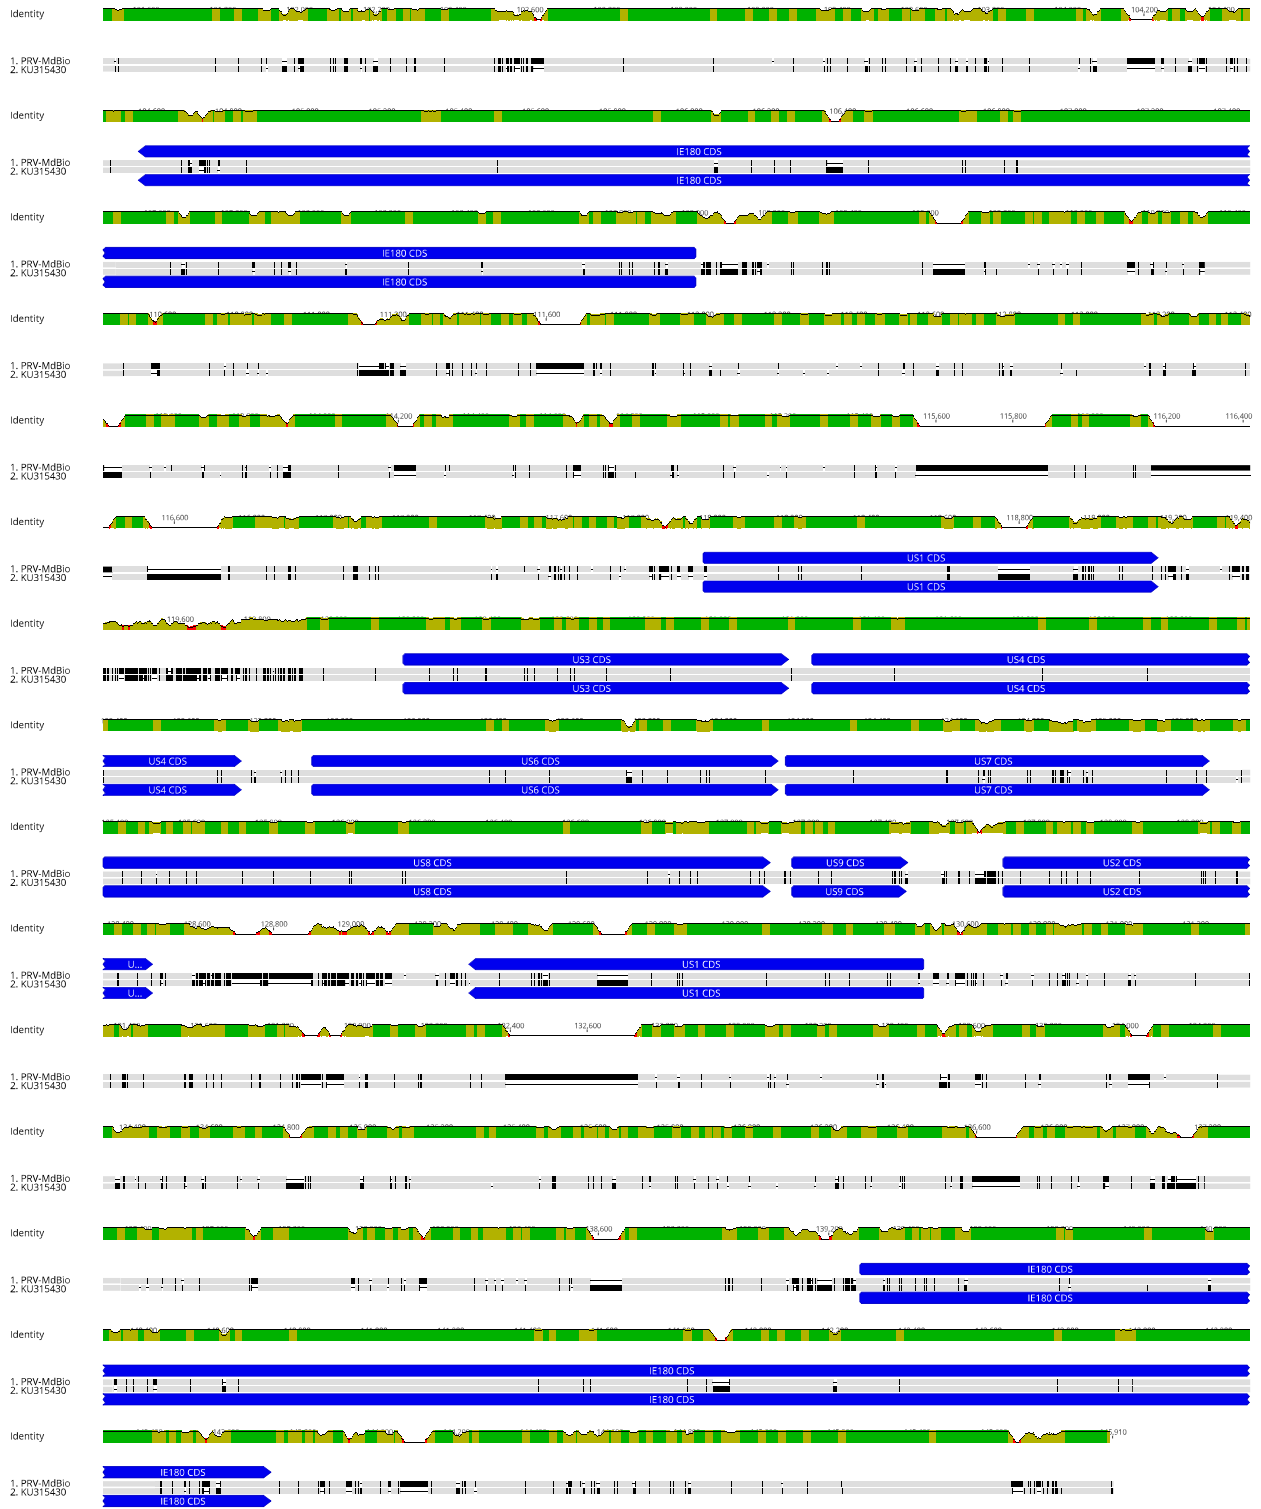

Supplement: f6 [file 1806842.f6.pdf]
