# Supplementary material for: Analysis of the Complete Genome Sequence of a Novel, Pseudorabies Virus Strain Isolated in Southeast Europe
Source: Hindawi journal article supplement (doi:10.1155/2019/1806842), 2019-04-04

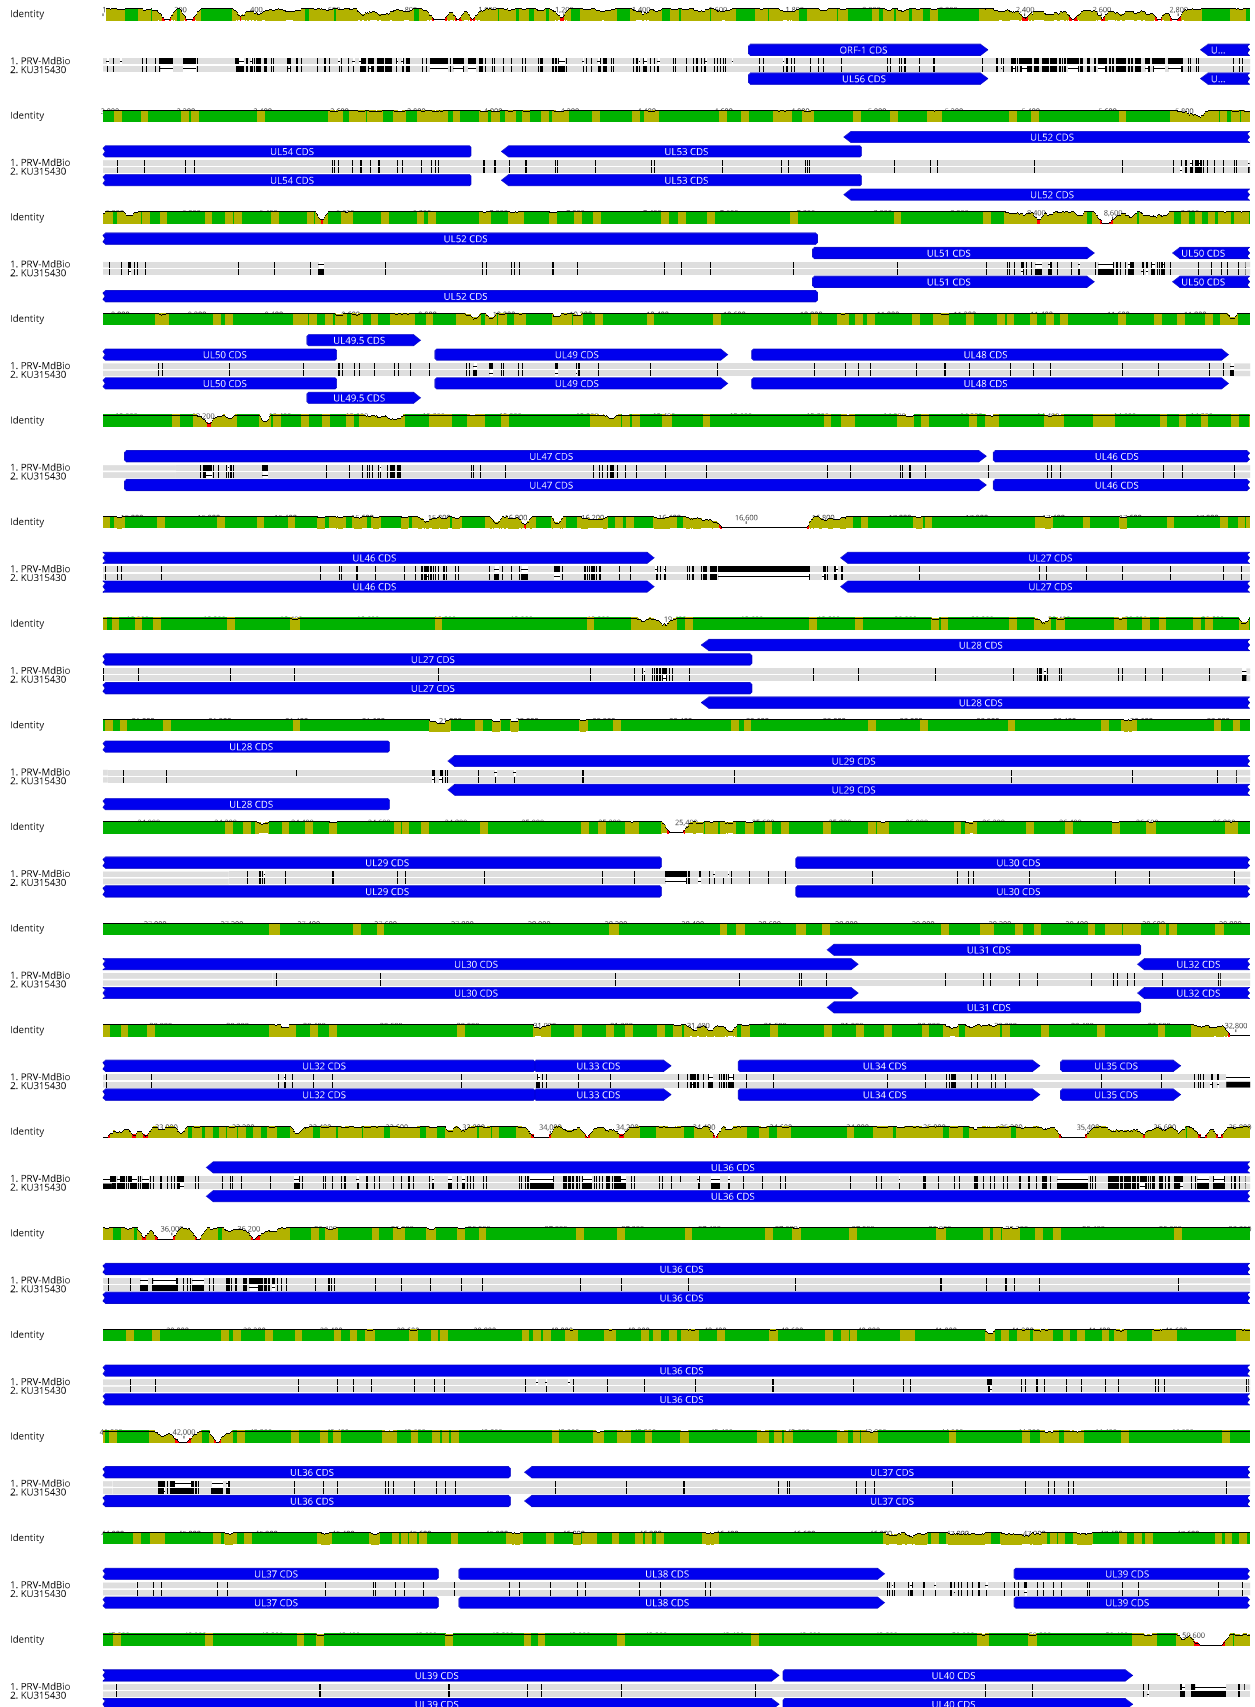

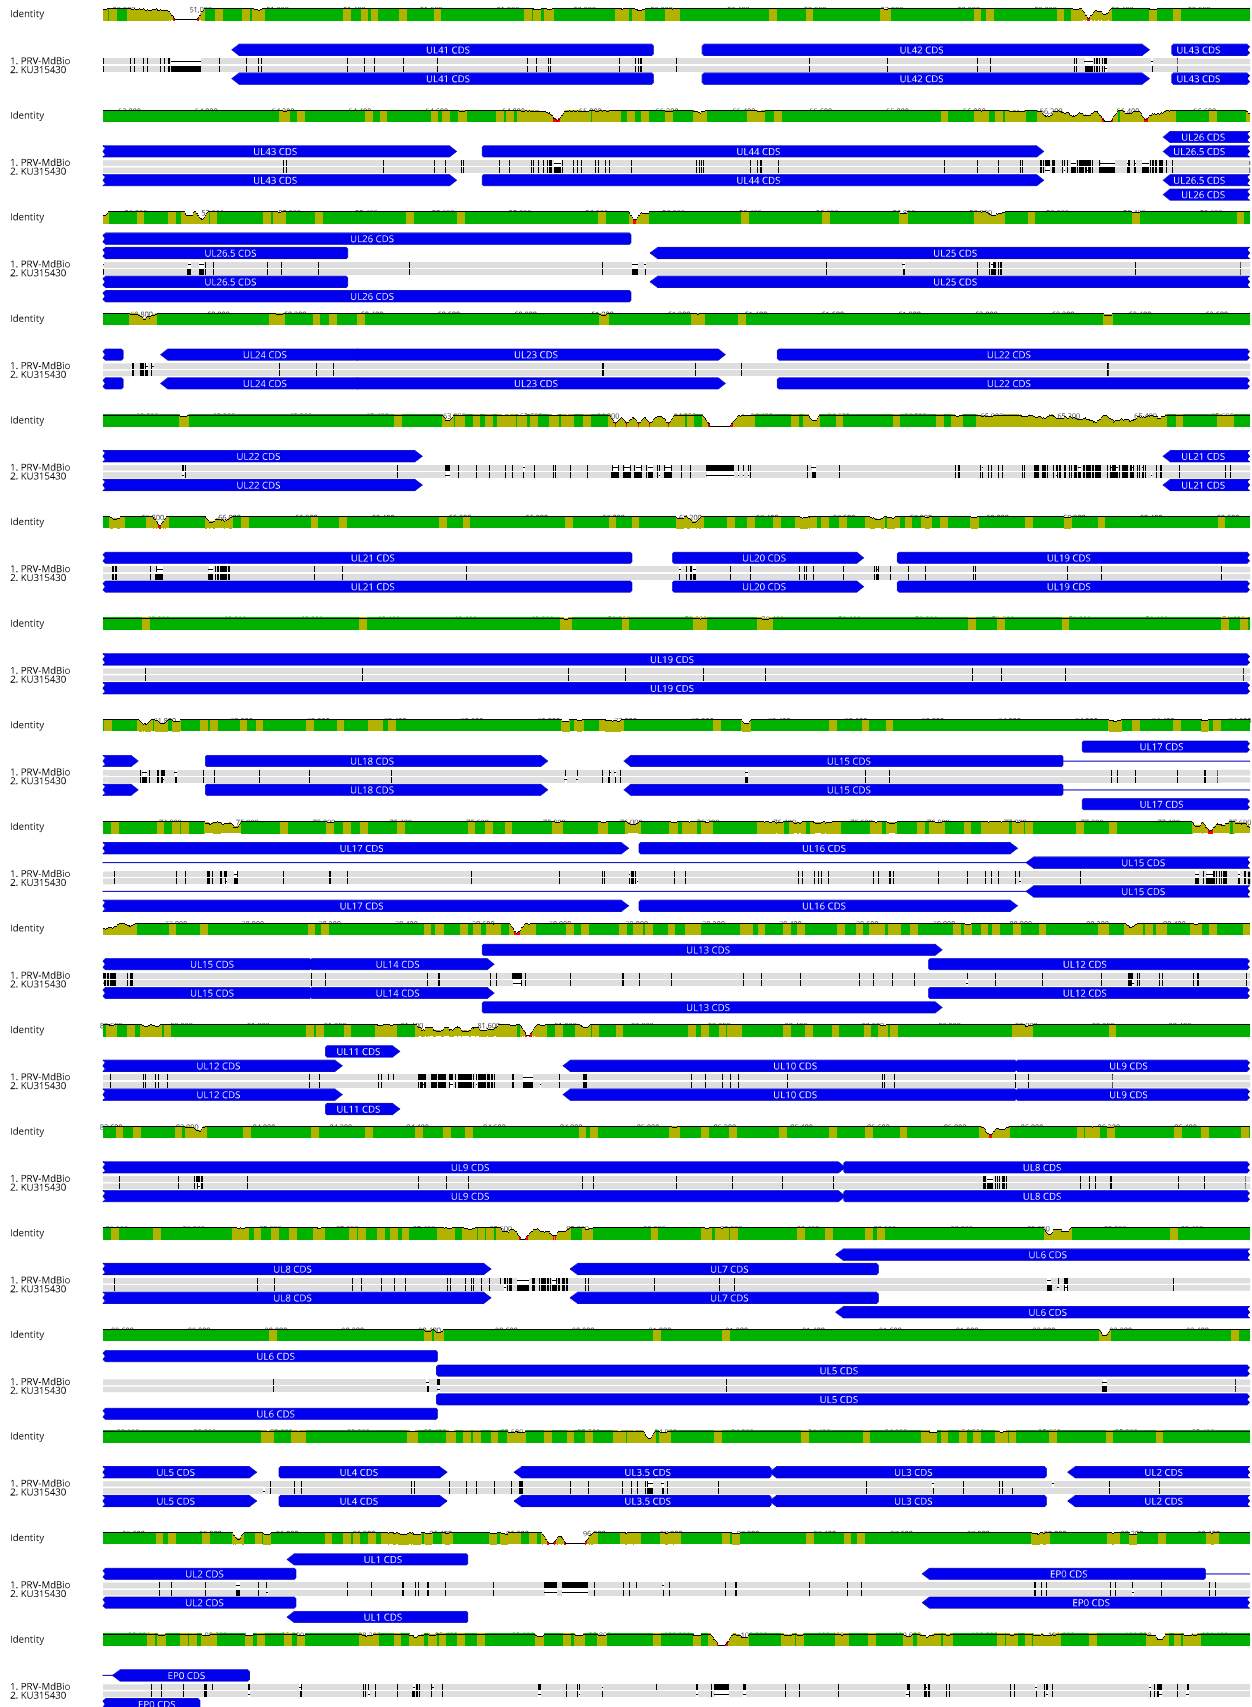

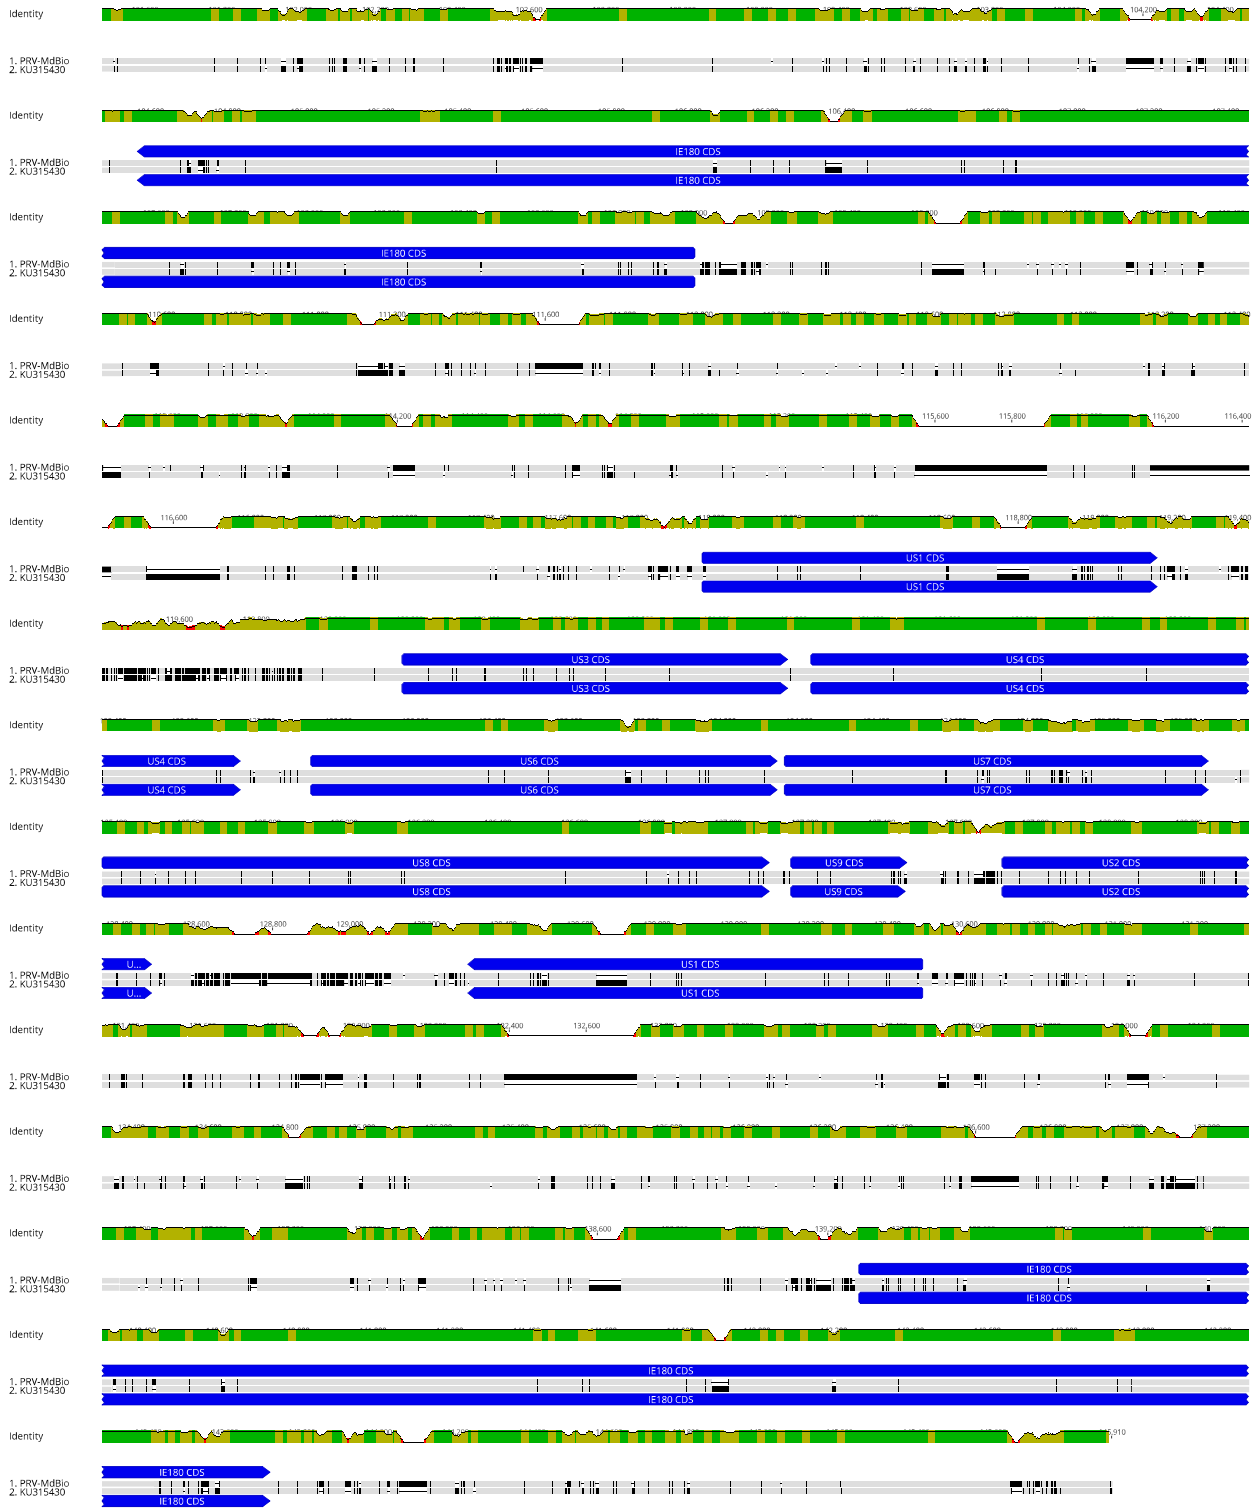

Supplement: f3 [file 1806842.f3.pdf]
